# Novel inhibitors against COVID-19 main protease suppressed viral infection

Vijayan Ramachandran<sup>1,2\*</sup>, Yanyun Liu<sup>1,2\*</sup>, Qianying He<sup>3\*</sup>, Andrew Tang<sup>4</sup>, Patrick Ronaldson<sup>5,6#</sup>,  
Dominik Schenten<sup>7#</sup>, Rui Chang<sup>1,2,6,8#</sup>

1. The Center for Innovation in Brain Sciences, University of Arizona, Tucson, AZ, USA

2. Department of Neurology, University of Arizona, Tucson, AZ, USA

3. Department of Biosystems Engineering, University of Arizona, Tucson, AZ, USA

4. Neuroscience Graduate Interdisciplinary Program, University of Arizona, Tucson, AZ, USA

5. Department of Pharmacology, College of Medicine, University of Arizona, Tucson, AZ, USA

6. PATH Biotech LLC, Tucson, AZ, USA

7. Department of Immunobiology, University of Arizona College of Medicine, Tucson, AZ, USA

8. INTelico Therapeutics LLC, Tucson, AZ, USA

## Summary

1 Severe acute respiratory syndrome coronavirus 2 (SARS-CoV-2), the etiologic agent of COVID-  
2 19, can cause severe disease with high mortality rates, especially among older and vulnerable  
3 populations. Despite the recent success of vaccines and approval of first-generation anti-viral  
4 inhibitor against SARS-CoV-2, an expanded arsenal of anti-viral compounds that limit viral  
5 replication and ameliorate disease severity is still urgently needed in light of the continued  
6 emergence of viral variants of concern (VOC). The main protease (Mpro) of SARS-CoV-2 is the  
7 major non-structural protein required for the processing of viral polypeptides encoded by the open  
8 reading frame 1 (ORF1) and ultimately replication. Structural conservation of Mpro among SARS-  
9 CoV-2 variants make this protein an attractive target for the anti-viral inhibition by small  
10 molecules. Here, we developed a structure-based *in-silico* screening of approximately 11 million

1 compounds in ZINC15 database inhibiting Mpro, which prioritized 9 lead compounds for the  
2 subsequent *in vitro* validation in SARS-CoV-2 replication assays using both Vero and Calu-3 cells.  
3 We validated three of these compounds significantly inhibited SARS-CoV-2 replication in the  
4 micromolar range. In summary, our study identified novel small-molecules significantly  
5 suppressed infection and replication of SARS-CoV-2 in human cells.

## 1 **Introduction**

2           Coronaviruses comprise a large family of positive single stranded RNA viruses that cause  
3 respiratory, gastrointestinal, and neurological diseases in humans and other animals <sup>1,2</sup>. Severe  
4 acute respiratory syndrome coronavirus 2 (SARS-CoV-2) <sup>3-6</sup>, the etiological agent of COVID-19  
5 and its ever-increasing evolutionary variants, has become a global health emergency with an urgent  
6 need for novel therapeutic strategies to combat the disease. Despite the remarkable and rapid  
7 success of vaccines against SARS-CoV-2<sup>7</sup> in the U.S. and other developed countries, significant  
8 infection risk remains among unvaccinated people, immunocompromised or otherwise vulnerable  
9 individuals forming a substantial reservoir to support viral spread, which make small-molecule  
10 inhibitors of SARS-CoV-2 replication urgently needed. In addition, vaccines mitigate but do not  
11 eliminate the likelihood of severe disease. Finally, the emergence of SARS-CoV-2 variants of  
12 concern (VOCs), such as the latest strain Omicron, which is highly contagious with increased  
13 likelihood to escape vaccine-derived immune surveillance, have raised concerns about the efficacy  
14 of the current vaccines, thus illustrating the importance of a wide arsenal of tools to combat the  
15 evolving current SARS-CoV-2 strains or novel future coronaviruses altogether.

16           The SARS-CoV-2 genome encodes several structural proteins including the membrane (M),  
17 envelope (E), and spike (S) proteins as well as multiple non-structural proteins that are necessary  
18 for viral replication or the manipulation of the host immune response <sup>8-10</sup>. The main protease (Mpro,  
19 also known as 3CLPro) is a cysteine protease that is critical for the cleavage of two polypeptide  
20 chains encoded by the overlapping open reading frames ORF1a and ORF1b into functional  
21 proteins <sup>11,12</sup>. Among these proteins is the essential RNA polymerase RdRp that is responsible for  
22 the replication of viral genome and whose activity is severely compromised without prior  
23 proteolytic cleavage by Mpro. In addition to the processing of viral proteins necessary for the viral

1 replication machinery, Mpro has also been suggested to interfere with the induction of cellular  
2 type I and type III interferon (IFN) and proinflammatory cytokine responses, either directly  
3 through the proteolytic cleavage of members of the IFN signaling cascade or indirectly by  
4 promoting the processing of other viral proteins that themselves interfere with IFN signaling<sup>13-15</sup>.  
5 The pharmacological inhibition of Mpro may therefore also limit viral replication by inducing a  
6 type I and type III IFN-dependent anti-viral state of the host cells.

7 To identify novel inhibitors of Mpro, we developed an *in-silico* pipeline to screen  
8 compounds in the ZINC15 database against Mpro and prioritized 9 lead compounds. We then  
9 validated the function of these lead compounds by using replication assays with SARS-CoV-2 in  
10 both rhesus monkey kidney-derived Vero cells and human lung-derived Calu-3 cells and identified  
11 three novel compounds that can significantly suppress the replication of SARS-CoV-2 by  
12 interfering with Mpro, therefore these compounds serve as starting point for further drug  
13 development.

## 1 **Results**

2

### 3 **Mpro is conserved among SARS-CoV-2 variants of concern.**

4 The frequent occurrence of mutations in the viral spike (S) protein among SARS-CoV-2 VOCs  
5 suggest that the S protein of SARS-CoV-2 remains under evolutionary pressure to adapt to the  
6 human ACE2 receptor. Mpro may be less sensitive to such selective pressure as it has a substrate  
7 specificity for viral proteins with unique glutamate-containing cleavage sites that are distinct from  
8 the sites used by known human proteases <sup>16</sup>. To evaluate whether Mpro is indeed structurally  
9 conserved among known SARS-CoV-2 strains, we compared the consensus sequence of original  
10 North-American WA1 strain to a range of SARS-CoV-2 variants of concern, including  
11 B.1.1.7(Alpha), B.1.351(Beta), B.1.427 & B.1.429 (Epsilon), B.1.525 (Eta), B.1526 (Iota),  
12 B.1.526.1, B.1.617.1 (Kappa), B.1.617.2 (Delta), P.1 (Gamma), P.2 (Zeta) and B.1.1.529  
13 (Omicron), as well as the more distantly related human coronaviruses SARS-CoV and MERS. We  
14 found that there are only three substitutions (K90R, L205V, P132H) in Mpro across all VOCs of  
15 SARS-CoV-2 (Online Method, Figure 1A, Supplementary Figure 1, Supplementary Table 1). The  
16 recently determined X-ray crystal structure of Mpro (PDB ID: 6W63) reveals four distinct regions  
17 of the main protease protomer, namely Domain I (residue 10-99) and Domain II (residue 100-184)  
18 that form antiparallel  $\beta$ -barrels, followed by a long connecting region (residues 185-200), and  
19 finally Domain III (residues 201-303) that forms a cluster of helices <sup>17</sup>. The substrate binding site  
20 is located in the cleft between domain I and domain II <sup>17</sup>. Compared to WA1, we found only three  
21 mutations in Mpro, namely a K90R mutation in the B.1.351 (Beta) strain and a L205V mutation in  
22 the P2 (Zeta) strain, and P132H mutation in B.1.1.529 (Omicron), none of the mutated residues  
23 were part of the substrate binding site (Figure 1A). In contrast, the mutation rate was significantly  
24 higher in S protein with 78 mutations (substitution, deletion, and insertion) (Online Method, Figure

1 1B, Supplementary Figure 2, Supplementary Table 1)<sup>18</sup>. Together, this comparison suggests that  
2 the substrate binding site of Mpro is more conserved among all known human SARS coronaviruses,  
3 thus making this an ideal anti-viral drug target.

4

#### 5 **Integrative *in-silico* screening identified novel candidate inhibitors of Mpro.**

6 Structure-based virtual screening is a fast and powerful method for lead compound  
7 discovery. We developed an integrative approach for *in-silico* screening and prioritizing (Figure  
8 2, Online Method) compounds targeting Mpro of SARS-CoV-2. In step 1, we downloaded 11  
9 million Drug-Like In-Stock 3D small molecules from ZINC15 database<sup>19</sup> and the X-ray crystal  
10 structure of Mpro from RCSB Protein Data Bank. In step 2, we prepared the X-ray crystal structure  
11 of Mpro with the Protein Preparation Wizard in Maestro from Schrödinger and prepared ligand by  
12 removing compounds with reactive functional groups to obtain 10.4 M compounds. In step 3, we  
13 defined the binding pockets of Mpro based on the reported inhibitor X77  
14 (<https://www.rcsb.org/structure/6W63>). In step 4, we performed virtual screening with  
15 Schrödinger<sup>20</sup> to select top-500 lead compounds(Online Method). In step 5, we prioritize the top-  
16 ranked 500 lead compounds by integrating two complementary strategies (Online Method), which  
17 lead to the selection of total 9 lead compounds (Supplementary Table 2) for *in-vitro* testing.

18 The identified 9 lead compounds showed higher binding affinity with Mpro (Supplementary Table  
19 2). From the molecular interaction analysis of docked complexes, we observed that all the 9 lead  
20 compounds show hydrogen bonding interactions and other potential hydrophobic or hydrophilic  
21 interactions with Mpro. All the 9 lead compounds were bound to the same binding site. Residue  
22 Leu141, Asn142, Gly143, Glu166, and Gln189 were the common interacting residues between  
23 Mpro and 9 lead compounds, which suggested the crucial role of these residues in stabilizing the

1 Mpro-ligand complex. Importantly, to demonstrate our 9 lead molecules are robust against VOCs  
2 of SARS-CoV-2, we built Mpro structures with K90R mutation in the B1.351 (Beta), L205V  
3 mutation in the P2 (Zeta), and P132H mutation in B.1.1.529 (Omicron), by using UCSF Chimera<sup>21</sup>  
4 followed by the Protein Preparation Wizard in the Schrödinger package and validated all  
5 compounds by docking them to these three mutant structures of Mpro. The docking results showed  
6 very similar binding affinities of these lead compounds to the mutant structures compared to wild-  
7 type Mpro suggesting that these lead compounds have the potential for the robust inhibition of the  
8 currently known VOCs of SARS-CoV-2.

9

#### 10 ***In vitro* validation of inhibitors of SARS-CoV-2 infection.**

11 We tested the ability of the selected 9 lead compounds to suppress SARS-CoV-2 infection in two  
12 experimental settings. Initially, we infected Vero cells with SARS-CoV-2 immediately after the  
13 addition of increasing concentrations of the lead compounds and measured the number of infected  
14 cells by viral reduction plaque assay 4 days later. Cells infected in the absence of the compounds  
15 served as positive control, whereas uninfected cells cultured in the presence of increasing  
16 concentrations of the compounds served as control for cytotoxicity. We observed a significant  
17 decrease in the number of infected cells compared to positive control for three of the 9 lead  
18 compounds, i.e. PATH-6, PATH-7, and PATH-8. We measured the cytopathic effect (CPE) on  
19 Vero cells 4 days after infection with SARS-CoV-2 in the presence of increasing concentrations  
20 0.001 to 100  $\mu$ M of the three compounds, starting at the time of infection (Figure 3). In parallel,  
21 we also determined the cytotoxicity of these compounds over the same dose range. These  
22 experiments revealed that PATH-6, PATH-7, and PATH-8 inhibited virus-induced CPE with an  
23 EC<sub>50</sub> between 1.57 – 9.3  $\mu$ M (Figure 3A-C). Importantly, PATH-6 showed no sign of cytotoxicity

1 (Figure 3A) and PATH-7 showed no sign of cytotoxicity within 10  $\mu$ M (Figure 3B). Overall, these  
2 experiments confirmed 3 out of the total 9 lead compounds significantly suppressed SARS-CoV-  
3 2 infection *in vitro* and especially PATH-6 is a promising compound for further investigation.



## 1 Discussion

2 Mpro, the main protease of SARS-CoV-2, plays a central role in the cleavage of the ORF1-  
3 encoded pp1a and pp1ab polypeptides to produce active viral proteins, including the RNA  
4 polymerase RdRP. Pharmacological inhibition of Mpro therefore likely inhibits SARS-CoV-2  
5 infection directly by preventing the replication of viral RNA genomes. Across currently 12 VOCs  
6 of SARS-CoV-2, the sequence of Mpro is significantly more conserved than the sequence of Spike  
7 protein, with only 3 mutations outside its known binding pocket. Therefore, Mpro represent an  
8 attractive drug target to interfere with viral replication. Recent studies have reported the possible  
9 inhibitors against Mpro of SARS-CoV-2<sup>22-26</sup>. Indeed, the recent approval of Paxlovid (PF-  
10 07321332), a derivative of the Mpro inhibitor GC376, demonstrated this target<sup>7</sup>. While the  
11 emergence of the first clinical SARS-CoV-2 Mpro inhibitor is encouraging, it is also clear that the  
12 continued expansion of the arsenal of anti-viral drugs is highly desirable.

13  
14 In the present study, we developed an *in-silico* screening pipeline which integrated the structure-  
15 based docking with pharmacokinetics prediction to prioritize approximately 11 million compounds  
16 for their ability to bind to Mpro and to block its enzymatic activity in the process of viral replication.  
17 To cross-check the binding affinities of the experimentally validated compounds predicted by our  
18 *in-silico* screening pipeline, we examined the binding mode of these compounds; PATH-6  
19 occupied the binding pocket with a Glide docking score of -11.79 kcal/mol, Vina score of -8.73  
20 kcal/mol, and MOE score of -14.81 kcal/mol. It forms seven hydrogen bonds with residues of  
21 Gly143, His164, Glu166, Thr190 and Gln192. PATH-7 fitted in the binding pocket with a Glide  
22 docking score of -8.99kcal/mol, Vina score of -7.77 kcal/mol, and MOE score of -6.86 kcal/mol.  
23 There are three hydrogen bonds formed between this compound and residue Ser144, Cys145, and

1 Gln189. PATH-8 located in the binding site with a Glide docking score of -9.00 kcal/mol, Vina  
2 score of -9.97 kcal/mol, and MOE score of -7.6 kcal/mol. Four hydrogen bonds were formed  
3 between the compound and residues Cys44, Thr190, and Gln192. The hydrogen bond, van der  
4 Waals, hydrophobic and Pi-Pi interactions between the validated three compounds and SARS-  
5 CoV-2 Mpro mainly occurred at the catalytic pocket with strong bonding to His41 and Cys145,  
6 indicating these residues may be particularly responsible for inhibiting SARS-CoV-2 Mpro.

7  
8 To test their inhibitory activity of SARS-CoV-2, we performed two rounds of *in vitro* experiments.  
9 The initial *in vitro* infection of cells with SARS-CoV-2 identified three out of the 9 lead  
10 compounds (PATH-6, PATH-7 and PATH-8) as potentially inhibitors of SARS-CoV-2 infection.  
11 We further fully confirmed the inhibition of SARS-CoV-2 infection for these compounds using a  
12 diverse set of assays in two distinct cell lines, namely African green monkey Vero cells and human  
13 lung Calu-3 cells.

14  
15 In summary, our study identified 3 novel compounds, i.e. PATH-6, PATH-7, and PATH-  
16 8, that not only directly inhibit viral replication by binding to Mpro, but also released the  
17 suppression of cellular anti-viral immune response by the virus. Hence, our antiviral compounds  
18 can be further optimized and added to the existing reservoir of the COVID-19 Mpro inhibitors for  
19 future drug development against SARS-CoV-2 and related coronaviruses.

20

## 1 **Materials and methods**

### 2 **Sequence alignment of Spike and 3C-like proteinase and its variants**

3 The protein sequences of Spike glycoprotein variants and 3C-like proteinase variants of SARS-  
4 CoV-2 isolates were retrieved from NCBI  
5 <https://www.ncbi.nlm.nih.gov/datasets/coronavirus/proteins/>). The Spike protein, 3C-like  
6 proteinase and its variants sequences were extracted using our UNIX script. To determine the level  
7 of the conservancy, multiple sequence alignment (MSA) was performed for the sequences using  
8 the BioEdit-ClustalW multiple alignment program  
9 (<http://www.mbio.ncsu.edu/BioEdit/bioedit.html>). After multiple alignment for all the download  
10 sequences for each variant, we created a consensus sequence. Next, we used Clustal Omega  
11 (<https://www.ebi.ac.uk/Tools/msa/clustalo/>) to align consensus sequence across all the VOCs of  
12 SARS-CoV-2, SARS-CoV, and MERS-CoV.

13

### 14 **Virtual screening.**

15 To identify the potential small molecular inhibitors for SARS-CoV-2 Mpro, the structure-based  
16 virtual screening was carried out by Virtual Screening Workflow (VSW) from Schrödinger suites<sup>20</sup>.  
17 A total around 11 million Drug-Like In-Stock 3D small molecules obtained from ZINC15  
18 database<sup>19</sup> were performed through VSW. Mpro structure was prepared using Protein Preparation  
19 Wizard in Maestro from Schrödinger<sup>29</sup>. Hydrogens were added to the protein and bond orders were  
20 assigned. All hydrogen-bonding networks were optimized, and the ionization states were assigned  
21 at pH 7.0. OPLS3e force field was used for restrained minimization. The docking grid was  
22 generated with the Receptor Grid Generation tool from Maestro. The default van der Waals scaling  
23 factor of 1.0 and partial charge cutoff at 0.25 was applied<sup>30</sup>. The center and the size of the grid box

1 were defined according to the position of the published inhibitor X77 in the crystal structure of  
2 Mpro (PDB ID: 6W63). To dock ligands with suitable pharmacological property, the small  
3 molecules were prefiltered by removing ligands with reactive functional groups. Around 10.4  
4 million compounds were obtained. Virtual screening was carried out in three sequential steps,  
5 namely (a) Glide high throughput virtual screening (HTVS) docking; After HTVS docking, (b)  
6 Glide standard precision (SP) docking, and finally (c) Glide extra precision (XP) docking. At each  
7 step, the top 10% of the compounds were advanced to the next step. Finally, according to the Glide  
8 score and protein-ligand interactions, top 500 lead compounds were selected for further  
9 evaluations.

10

#### 11 **Auto Dock Vina and MOE docking.**

12 Different docking methods, including Auto Dock Vina docking and MOE docking, were used to  
13 predict the binding affinity of the top 500 lead compounds which were prioritized based on  
14 previous Glide score against Mpro. Auto Dock Vina is a widely used open-source docking  
15 program<sup>31</sup>. The Mpro and structures of the top 500 lead compounds were prepared with Auto Dock  
16 Tools<sup>32</sup>. All hydrogens were added and Gasteiger charges were assigned. The center and the size  
17 of the grid box were defined according to the position of the published inhibitor X77  
18 (<https://www.rcsb.org/structure/6W63>). The level of exhaustiveness was set to 8. The Auto Dock  
19 Vina docking score was used to rank the binding affinity of different docking poses. The docking  
20 calculations were repeated 3 times with different random seeds.

21

22 Next, we employed MOE docking<sup>33,34</sup> to calculate the binding affinity of the top 500 lead  
23 compounds. The protein was kept as rigid, and a maximum of 30 conformations for each ligand

1 was tested, using the default parameters of MOE using Triangle Matcher placement. The top  
2 ranked conformations of lead molecules were stored. On the basis of MOE scoring (London dG),  
3 binding free energy calculation in the S field was scored, as the London dG is a scoring function  
4 that estimates the free energy of binding of the ligand for a given pose. For all scoring functions,  
5 lower scores indicate more favorable poses.

6

## 7 **Toxicity Prediction**

8 The *in-silico* toxicity properties were predicted by Data Warrior<sup>35</sup>. Data Warrior was used to  
9 predict the molecular weight (MW), mutagenicity, tumorigenicity, and irritant properties as well  
10 as pharmacokinetic properties, Topological Molecular Surface area (TPSA), partition coefficient  
11 ( $\log P$ ) for the identified top 500 molecules. Toxicity risks were predicted from precompiled lists  
12 of fragments using an algorithm that gives rise to toxicity alerts in case they encounter the structure  
13 in evaluation<sup>36</sup>.

14

## 15 **Top 500 lead compounds prioritization**

16 To prioritize robust compounds for experiment validation, we developed an ensemble of two  
17 complementary strategies. In the first strategy, we employed a *screening-driven* approach to  
18 prioritize robust lead compounds. We first ranked the top 500 lead compounds based on the Glide  
19 score, then we focus on the top 50 lead compounds. Next, we rank these top 50 lead compounds  
20 according to the average (priority score) of the individual Glide, Vina and MOE docking scores  
21 rank. Then, we calculated the binding mode clustering by Schrödinger and structure similarity  
22 clustering by Data Warrior. Among the top 50 compounds, we identified 10 binding mode clusters  
23 and 23 structure similarity clusters. We removed 6 compounds based on the predicted toxic

1 pharmacological properties by Data Warrior. For the remaining 44 compounds, we first selected  
2 the top compound with the highest priority score within each binding mode cluster to obtain total  
3 9 compounds. Next, we examined the 9 compounds against their structure similarity and selected  
4 the top compound per structure similarity cluster with highest priority score. Note that 3 of the 9  
5 compounds belong to the same similarity cluster, so the total number of selected compounds is 7.  
6 Finally, 4 out of the final selected 7 compounds are commercially available and are used for the  
7 subsequent *in-vitro* infection experiments.

8         In the second strategy, we employed a pharmacology-informed approach to prioritize the  
9 top 500 compounds by integrating the docking score (Glide score) with molecular weight (MW)  
10 mutagenicity, tumorigenicity, and irritant properties as well as pharmacokinetic properties, the  
11 total polar surface area (TPSA)<sup>37</sup> and the partition coefficient (LogP)<sup>38</sup> of these compounds. First,  
12 we removed 322 compounds with molecular weight greater than 500 Daltons resulting in 178  
13 compounds. Second, we used the same toxicity criteria as above to remove 27 potentially toxic  
14 compounds. Third, we ranked the remaining 151 compounds according to their Glide score which  
15 ranges from -10.67 to -8.87 and we divided the scores into two bins: [-10.67, -9] and [-9, -8]. We  
16 selected the top compound from each bin. Fourth, since natural compounds are more accessible,  
17 can have anti-viral effects against SARS-CoV-2<sup>39-44</sup>, and may help to accelerate drug development,  
18 we focused on prioritizing natural compounds for the remaining 149 compounds, of which 16 are  
19 natural compounds according to ZINC database classification<sup>19</sup>. Next, since drug-like molecules  
20 should be water-soluble to reach target tissues and enter cells through passive mechanisms such as  
21 the diffusion through cellular membranes. The ideal distribution coefficient for the tested  
22 compounds should therefore be neither too lipophilic nor too hydrophilic. Such pharmacological  
23 properties determines the good absorption and distribution *in vivo* and guide the translation of

1 chemical inhibitors or viral replication into successful drugs for patients <sup>45</sup>. To select drug-like  
2 natural compounds, we set TPSA values between 118 and 148 and LogP values between 2 and 4  
3 following previous published practice <sup>37,38</sup>, which resulted in 3 out of the 16 natural compounds.  
4 In total, we prioritized 5 compounds by pharmacology-informed approach which were all  
5 commercially available for experimental testing.

6  
7 In summary, we selected 7 compounds by screening-driven approach, out of which 4 compounds  
8 are commercially available, and 5 compounds by pharmacology-informed approach, all of which  
9 are commercially available. Therefore, total 9 compounds were ordered for experimental  
10 validations.

11  
12 **Cells.** Vero and Calu-3 cells were obtained from the American Type Culture Collection (ATCC)  
13 and cultured according to the recommendations provided by the ATCC. The cells were routinely  
14 monitored for the absence of mycoplasma infection.

15  
16 **Compounds.** Potential inhibitors of Mpro identified in the virtual screens were obtained from  
17 MolPort and eMolecules and dissolved at 10 mM in PBS or PBS + 10% DMSO. The compounds  
18 were further diluted >100-fold in tissue culture medium containing 5% FCS to obtain working  
19 concentrations for the viral replication assays.

20 **Virus production.** SARS-CoV-2 strain WA1 and West Nile virus (WNV) strain NY99 were  
21 obtained from BEI Resources and propagated in Vero cells. The cells were infected with SARS-  
22 CoV-2 at an MOI of 0.005 and with WNV at an MOI of 0.01. After 48 hr (SARS-CoV-2) or 72 hr  
23 (WNV) of culture, the cells were harvested with a cell scraper and spun and together with the

1 culture medium at 3000 rpm for 10 min. Supernatants were set aside while the resuspended cell  
2 pellets were treated with a Dounce homogenizer and subjected to two freeze-thaw cycles before  
3 combined with the original supernatants. Following an additional centrifugation step, supernatants  
4 were aliquoted, frozen, and subsequently titered in serial dilutions by viral plaque assay. All work  
5 with SARS-CoV-2 and WNV was performed under BSL3 conditions in a facility with negative  
6 pressure and PPE that included Tyvek suits and N95 masks for respiratory protection.

7

8 **Viral plaque and foci assays.** The number of infectious SARS-CoV-2 virions was quantified by  
9 viral plaque assay. To this end, Vero cells were incubated with SARS-CoV-2 for 2 hr and  
10 subsequently overlaid with 1% methylcellulose in culture medium. After 3-4 days, the cells were  
11 fixed in 10% formalin for 30 min, washed under tap water, and stained with crystal violet. The  
12 number of plaques corresponding to infections of individual cells by single virions was counted  
13 on a light table. The quantification of infectious WNV virions was performed similarly with the  
14 exception that the number of infected cell foci was determined by intracellular staining using a  
15 biotinylated anti-WNV-E antibody (clone E16), followed by an HRP-labeled anti-streptavidin  
16 antibody. HRP activity was detected with KPL Trueblue substrate (SeraCare).

17

18 **Cytopathic effect and cytotoxicity measurements and other assays to determine drug activity.**

19 Viral replication of SARS-CoV-2 in the presence of Mpro inhibitors was measured in Vero or  
20 Calu-3 cells in three ways. In the first approach, Vero or Calu-3 cells were infected with SARS-  
21 CoV-2 at an MOI of 0.01 in the presence of indicated concentrations of Mpro inhibitors and, if  
22 applicable, with 1.5  $\mu$ M of the P-gp inhibitor CP-100356. The virus-induced cytopathic effect was  
23 measured by determining the fraction of formalin-fixed adherent cells that remained after 3 days



1 (Vero cells) or 4 days (Calu-3 cells). To this end, the cells were stained with crystal violet, PBS-  
2 washed, and air-dried. Following resuspension in methanol, crystal violet staining was measured  
3 in the Spectrophotometer at OD<sub>594</sub>. Cytotoxicity of the compounds was measured in parallel by the  
4 staining of uninfected cells incubated with the Mpro. In a second approach, drug activity was  
5 determined in Vero cells directly by viral plaque assay, using between 100-500 Pfu/well of virus  
6 and indicated concentrations of Mpro inhibitors. In a third approach, Vero cells were infected with  
7 SARS-CoV-2 or WNV at an MOI of 0.01 in the presence of 100 mM of Mpro inhibitors for 2-3  
8 days. Viral replication was measured indirectly at indicated time points by quantifying the titers  
9 of infectious virions in the supernatants with viral plaque or foci assays in the absence of the  
10 compounds. Viral replication in Calu-3 cells in the presence of indicated concentrations of  
11 compounds was determined similarly.

12

13 **RT-qPCR.** RNA was isolated from infected cells, reverse-transcribed with random hexamers, and  
14 subsequently amplified using the SYBR mix on a Quant3 Real-Time PCR cyclers.

### **Acknowledgements.**

We would like to thank Jennifer Uhrlaub and the University of Arizona Keating BIO5 BSL3 facility for expert technical advice, logistical help, and overall facility management. We also like to thank Dr. Wei Wang at the University of Arizona for scientific feedback and critical reading of the manuscript. Dr. Rui Chang is the founder of INTelico Therapeutics LLC and co-founder of PATH BIOTECH LLC. Dr. Patrick Ronaldson is the co-founder of PATH Biotech LLC. This study is not supported by any company.

1 **Figure legends**

2 **Figure 1. The structure of Mpro and Spike protein across SARS-CoV-2 variants.** (A) The  
3 active site residues of Mpro are highlighted in red color. Omicron-specific mutation, P132H (B.  
4 1.1529) of Mpro protein are highlighted in blue. Mutations of Mpro protein (K90R, L205V) from  
5 the B.1.351 and P.2 variants are highlighted in black. (B) The active site residues of Spike protein  
6 are highlighted in red. Omicron-specific mutations of Spike protein are highlighted in blue.  
7 Mutations of Spike protein from all the other VOCs are highlighted in black.

8

9

10 **Figure 2. *In-silico* screening workflow of SARS-CoV-2 Mpro inhibitor.** Workflow for the  
11 identification of potential small molecular inhibitors for SARS-CoV-2 Mpro. The structure-based  
12 virtual screening was carried out using Schrödinger, MOE, Vina. After virtual screening, the top-  
13 ranked 500 lead compounds were prioritized based on the Schrödinger Glide score and further  
14 independently prioritized using two strategies that ultimately led to total of 9 lead molecules for  
15 *in-vitro* testing.

16

17 **Figure 3. CPE and cytotoxicity in Vero cells treated with putative SARS-CoV-2 Mpro**  
18 **inhibitors.** (A-C) Vero cells were incubated with the P-gp inhibitor CP-100356 and infected with  
19 SARS-CoV-2 in the presence of increasing concentrations of putative Mpro inhibitors. CPE (red  
20 line) and cytotoxicity (black line) of the inhibitors was determined 3 days later and expressed as  
21 fraction of adherent cells in infected samples relative to uninfected controls (CPE) or untreated  
22 cells (cytotoxicity). The amount of adherent cells was quantified by the spectrophotometrical  
23 measurement of crystal violet staining. Shown are the results of (A) PATH-6, (B) PATH-7, (C)

1 PATH-8. Each experiment was set-up in triplicates and independently repeated three times. The  
2 EC50 of viral inhibition and the 95% confidence interval is indicated in each graph.

3

4

5 **Supplementary Figure 1. Sequence comparison of Mpro across SARS-CoV-2 variants and**  
6 **other human  $\beta$ -coronaviruses.** The locations of non-synonymous mutations resulting in a lysine  
7 to arginine mutation in the SARS-CoV-2 B.1.351 (Beta) variant, a leucine to valine mutation in  
8 the SARS-CoV-2 P.2 (Zeta) variant, and proline to histidine mutation in the SARS-CoV-2  
9 B.1.1.529 (Omicron) variant are shown in red box.

10

11 **Supplementary Figure 2. Sequence comparison of Spike protein across SARS-CoV-2**  
12 **variants and other human  $\beta$ -coronaviruses.** Mutations of Spike protein across all VOCs of  
13 SARS-CoV-2 are highlighted in red box. The mutation rate was significantly higher in Spike  
14 protein with 78 mutations (substitution, deletion and insertion).

15

16 **Supplementary Table 1:** Mutations of Mpro and Spike protein across SARS-CoV-2 VOCs.

17

18 **Supplementary Table 2:** Summary of in-silico screening results for the prioritized 9 lead  
19 inhibitors of Mpro of SARS-CoV-2.

## References

- 1 1 de Wit, E., van Doremalen, N., Falzarano, D. & Munster, V. J. SARS and MERS: recent  
2 insights into emerging coronaviruses. *Nat Rev Microbiol* **14**, 523-534,  
3 doi:10.1038/nrmicro.2016.81 (2016).
- 4 2 Zumla, A., Chan, J. F., Azhar, E. I., Hui, D. S. & Yuen, K. Y. Coronaviruses - drug  
5 discovery and therapeutic options. *Nat Rev Drug Discov* **15**, 327-347,  
6 doi:10.1038/nrd.2015.37 (2016).
- 7 3 Wu, F. *et al.* A new coronavirus associated with human respiratory disease in China.  
8 *Nature* **579**, 265-269, doi:10.1038/s41586-020-2008-3 (2020).
- 9 4 Zhou, P. *et al.* A pneumonia outbreak associated with a new coronavirus of probable bat  
10 origin. *Nature* **579**, 270-273, doi:10.1038/s41586-020-2012-7 (2020).
- 11 5 Li, Q. *et al.* Early Transmission Dynamics in Wuhan, China, of Novel Coronavirus-  
12 Infected Pneumonia. *N Engl J Med* **382**, 1199-1207, doi:10.1056/NEJMoa2001316  
13 (2020).
- 14 6 Zhu, N. *et al.* A Novel Coronavirus from Patients with Pneumonia in China, 2019. *N*  
15 *Engl J Med* **382**, 727-733, doi:10.1056/NEJMoa2001017 (2020).
- 16 7 Cully, M. A tale of two antiviral targets - and the COVID-19 drugs that bind them. *Nat*  
17 *Rev Drug Discov*, doi:10.1038/d41573-021-00202-8 (2021).
- 18 8 Azeez, S. A. *et al.* State-of-the-art tools to identify druggable protein ligand of SARS-  
19 CoV-2. *Arch Med Sci* **16**, 497-507, doi:10.5114/aoms.2020.94046 (2020).
- 20 9 Borgio, J. F. *et al.* State-of-the-art tools unveil potent drug targets amongst clinically  
21 approved drugs to inhibit helicase in SARS-CoV-2. *Arch Med Sci* **16**, 508-518,  
22 doi:10.5114/aoms.2020.94567 (2020).
- 23 10 Chen, Y., Liu, Q. & Guo, D. Emerging coronaviruses: Genome structure, replication, and  
24 pathogenesis. *J Med Virol* **92**, 418-423, doi:10.1002/jmv.25681 (2020).
- 25 11 Hegyi, A. & Ziebuhr, J. Conservation of substrate specificities among coronavirus main  
26 proteases. *J Gen Virol* **83**, 595-599, doi:10.1099/0022-1317-83-3-595 (2002).
- 27 12 V'Kovski, P., Kratzel, A., Steiner, S., Stalder, H. & Thiel, V. Coronavirus biology and  
28 replication: implications for SARS-CoV-2. *Nat Rev Microbiol* **19**, 155-170,  
29 doi:10.1038/s41579-020-00468-6 (2021).
- 30 13 Lowery, S. A., Sariol, A. & Perlman, S. Innate immune and inflammatory responses to  
31 SARS-CoV-2: Implications for COVID-19. *Cell Host Microbe* **29**, 1052-1062,  
32 doi:10.1016/j.chom.2021.05.004 (2021).
- 33 14 Wu, Y. *et al.* Main protease of SARS-CoV-2 serves as a bifunctional molecule in  
34 restricting type I interferon antiviral signaling. *Signal Transduct Target Ther* **5**, 221,  
35 doi:10.1038/s41392-020-00332-2 (2020).
- 36 15 Schenten, D. & Bhattacharya, D. Immunology of SARS-CoV-2 infections and vaccines.  
37 *Adv Immunol* **151**, 49-97, doi:10.1016/bs.ai.2021.08.002 (2021).
- 38 16 Anand, K., Ziebuhr, J., Wadhwani, P., Mesters, J. R. & Hilgenfeld, R. Coronavirus main  
39 proteinase (3CLpro) structure: basis for design of anti-SARS drugs. *Science* **300**, 1763-  
40 1767, doi:10.1126/science.1085658 (2003).
- 41 17 Yang, H. *et al.* The crystal structures of severe acute respiratory syndrome virus main  
42 protease and its complex with an inhibitor. *Proc Natl Acad Sci U S A* **100**, 13190-13195,  
43 doi:10.1073/pnas.1835675100 (2003).

- 1 18 Korber, B. *et al.* Tracking Changes in SARS-CoV-2 Spike: Evidence that D614G  
2 Increases Infectivity of the COVID-19 Virus. *Cell* **182**, 812-827 e819,  
3 doi:10.1016/j.cell.2020.06.043 (2020).
- 4 19 Sterling, T. & Irwin, J. J. ZINC 15--Ligand Discovery for Everyone. *J Chem Inf Model*  
5 **55**, 2324-2337, doi:10.1021/acs.jcim.5b00559 (2015).
- 6 20 Schrödinger. Schrödinger Suite, Virtual Screening Workflow.
- 7 21 Pettersen, E. F. *et al.* UCSF Chimera--a visualization system for exploratory research and  
8 analysis. *J Comput Chem* **25**, 1605-1612, doi:10.1002/jcc.20084 (2004).
- 9 22 Li, Z. *et al.* Identify potent SARS-CoV-2 main protease inhibitors via accelerated free  
10 energy perturbation-based virtual screening of existing drugs. *Proc Natl Acad Sci U S A*  
11 **117**, 27381-27387, doi:10.1073/pnas.2010470117 (2020).
- 12 23 Huff, S. *et al.* Discovery and Mechanism of SARS-CoV-2 Main Protease Inhibitors. *J*  
13 *Med Chem*, doi:10.1021/acs.jmedchem.1c00566 (2021).
- 14 24 Banerjee, R., Perera, L. & Tillekeratne, L. M. V. Potential SARS-CoV-2 main protease  
15 inhibitors. *Drug Discov Today* **26**, 804-816, doi:10.1016/j.drudis.2020.12.005 (2021).
- 16 25 Sabbah, D. A., Hajjo, R., Bardaweel, S. K. & Zhong, H. A. An Updated Review on  
17 SARS-CoV-2 Main Proteinase (M(Pro)): Protein Structure and Small-Molecule  
18 Inhibitors. *Curr Top Med Chem* **21**, 442-460, doi:10.2174/1568026620666201207095117  
19 (2021).
- 20 26 Zhang, L. *et al.* Crystal structure of SARS-CoV-2 main protease provides a basis for  
21 design of improved alpha-ketoamide inhibitors. *Science* **368**, 409-412,  
22 doi:10.1126/science.abb3405 (2020).
- 23 27 Channappanavar, R. *et al.* IFN-I response timing relative to virus replication determines  
24 MERS coronavirus infection outcomes. *J Clin Invest* **129**, 3625-3639,  
25 doi:10.1172/JCI126363 (2019).
- 26 28 Channappanavar, R. *et al.* Dysregulated Type I Interferon and Inflammatory Monocyte-  
27 Macrophage Responses Cause Lethal Pneumonia in SARS-CoV-Infected Mice. *Cell Host*  
28 *Microbe* **19**, 181-193, doi:10.1016/j.chom.2016.01.007 (2016).
- 29 29 Sastry, G. M., Adzhigirey, M., Day, T., Annabhimoju, R. & Sherman, W. Protein and  
30 ligand preparation: parameters, protocols, and influence on virtual screening enrichments.  
31 *J Comput Aided Mol Des* **27**, 221-234, doi:10.1007/s10822-013-9644-8 (2013).
- 32 30 Liu, Y., Ebalunode, J. O. & Briggs, J. M. Insights into the substrate binding specificity of  
33 quorum-quenching acylase PvdQ. *J Mol Graph Model* **88**, 104-120,  
34 doi:10.1016/j.jmgm.2019.01.006 (2019).
- 35 31 Wang, Z. *et al.* Comprehensive evaluation of ten docking programs on a diverse set of  
36 protein-ligand complexes: the prediction accuracy of sampling power and scoring power.  
37 *Phys Chem Chem Phys* **18**, 12964-12975, doi:10.1039/c6cp01555g (2016).
- 38 32 Morris, G. M. *et al.* AutoDock4 and AutoDockTools4: Automated docking with selective  
39 receptor flexibility. *J Comput Chem* **30**, 2785-2791, doi:10.1002/jcc.21256 (2009).
- 40 33 Kumari, P., Vijayan, R. & Gourinath, S. Structural analysis of EhPSP in complex with 3-  
41 phosphoglyceric acid from *Entamoeba histolytica* reveals a basis for its lack of  
42 phosphoglycerate mutase activity. *Int J Biol Macromol* **178**, 1-10,  
43 doi:10.1016/j.ijbiomac.2021.02.153 (2021).
- 44 34 Corbeil, C. R., Williams, C. I. & Labute, P. Variability in docking success rates due to  
45 dataset preparation. *J Comput Aided Mol Des* **26**, 775-786, doi:10.1007/s10822-012-  
46 9570-1 (2012).

- 1 35 Sander, T., Freyss, J., von Korff, M. & Rufener, C. DataWarrior: an open-source program  
2 for chemistry aware data visualization and analysis. *J Chem Inf Model* **55**, 460-473,  
3 doi:10.1021/ci500588j (2015).
- 4 36 von Korff, M. & Sander, T. Toxicity-indicating structural patterns. *J Chem Inf Model* **46**,  
5 536-544, doi:10.1021/ci050358k (2006).
- 6 37 Ghattas, M. A., Raslan, N., Sadeq, A., Al Sorkhy, M. & Atatreh, N. Druggability analysis  
7 and classification of protein tyrosine phosphatase active sites. *Drug Des Devel Ther* **10**,  
8 3197-3209, doi:10.2147/DDDT.S111443 (2016).
- 9 38 Czyski, A. Determination of the Lipophilicity of Ibuprofen, Naproxen, Ketoprofen, and  
10 Flurbiprofen with Thin-Layer Chromatography. *Journal of Chemistry* **2019**, 1-6,  
11 doi:10.1155/2019/3407091 (2019).
- 12 39 Hensel, A. *et al.* Challenges at the Time of COVID-19: Opportunities and Innovations in  
13 Antivirals from Nature. *Planta Med* **86**, 659-664, doi:10.1055/a-1177-4396 (2020).
- 14 40 Abian, O. *et al.* Structural stability of SARS-CoV-2 3CLpro and identification of  
15 quercetin as an inhibitor by experimental screening. *Int J Biol Macromol* **164**, 1693-1703,  
16 doi:10.1016/j.ijbiomac.2020.07.235 (2020).
- 17 41 Muchtaridi, M., Fauzi, M., Khairul Ikram, N. K., Mohd Gazzali, A. & Wahab, H. A.  
18 Natural Flavonoids as Potential Angiotensin-Converting Enzyme 2 Inhibitors for Anti-  
19 SARS-CoV-2. *Molecules* **25**, doi:10.3390/molecules25173980 (2020).
- 20 42 Khalifa, S. A. M. *et al.* Screening for natural and derived bio-active compounds in  
21 preclinical and clinical studies: One of the frontlines of fighting the coronaviruses  
22 pandemic. *Phytomedicine* **85**, 153311, doi:10.1016/j.phymed.2020.153311 (2021).
- 23 43 Jin, Z. *et al.* Structure of M(pro) from SARS-CoV-2 and discovery of its inhibitors.  
24 *Nature* **582**, 289-293, doi:10.1038/s41586-020-2223-y (2020).
- 25 44 Kiani, A. K. *et al.* Natural compounds as inhibitors of SARS-CoV-2 endocytosis: A  
26 promising approach against COVID-19. *Acta Biomed* **91**, e2020008,  
27 doi:10.23750/abm.v91i13-S.10520 (2020).
- 28 45 Lucas, A. J., Sproston, J. L., Barton, P. & Riley, R. J. Estimating human ADME  
29 properties, pharmacokinetic parameters and likely clinical dose in drug discovery. *Expert*  
30 *Opin Drug Discov* **14**, 1313-1327, doi:10.1080/17460441.2019.1660642 (2019).



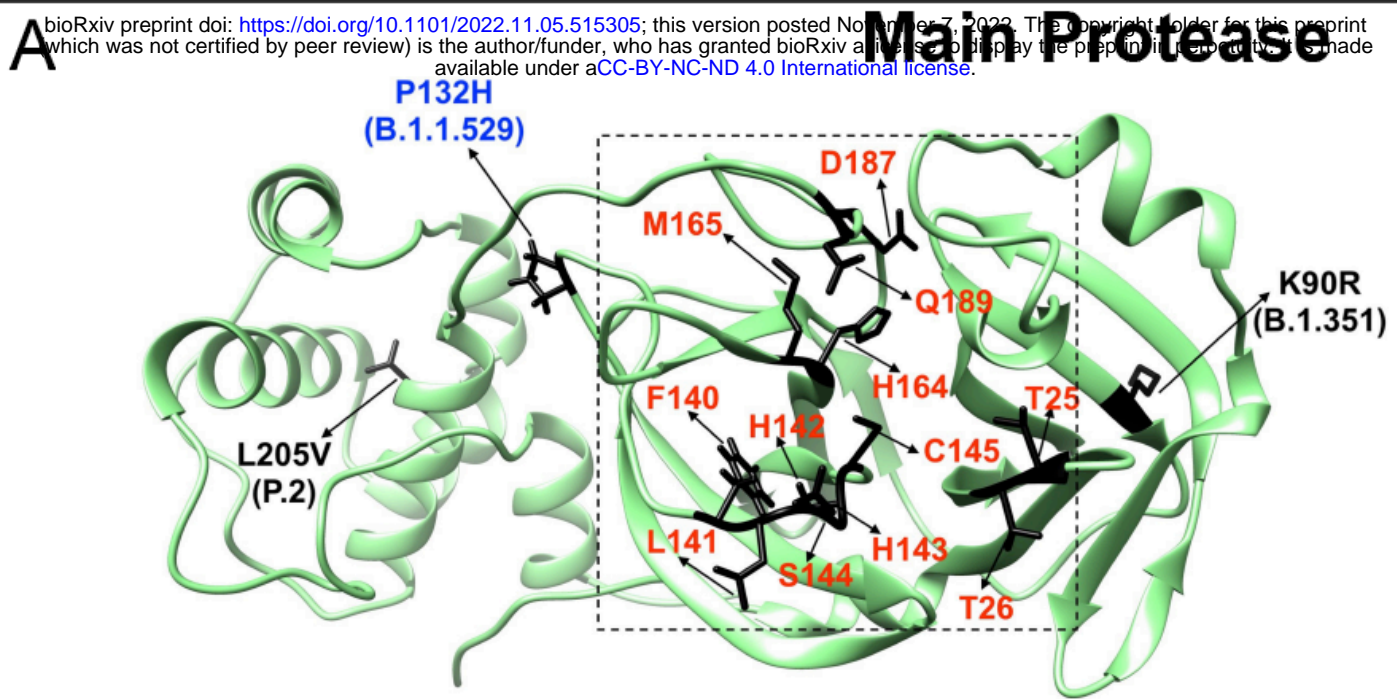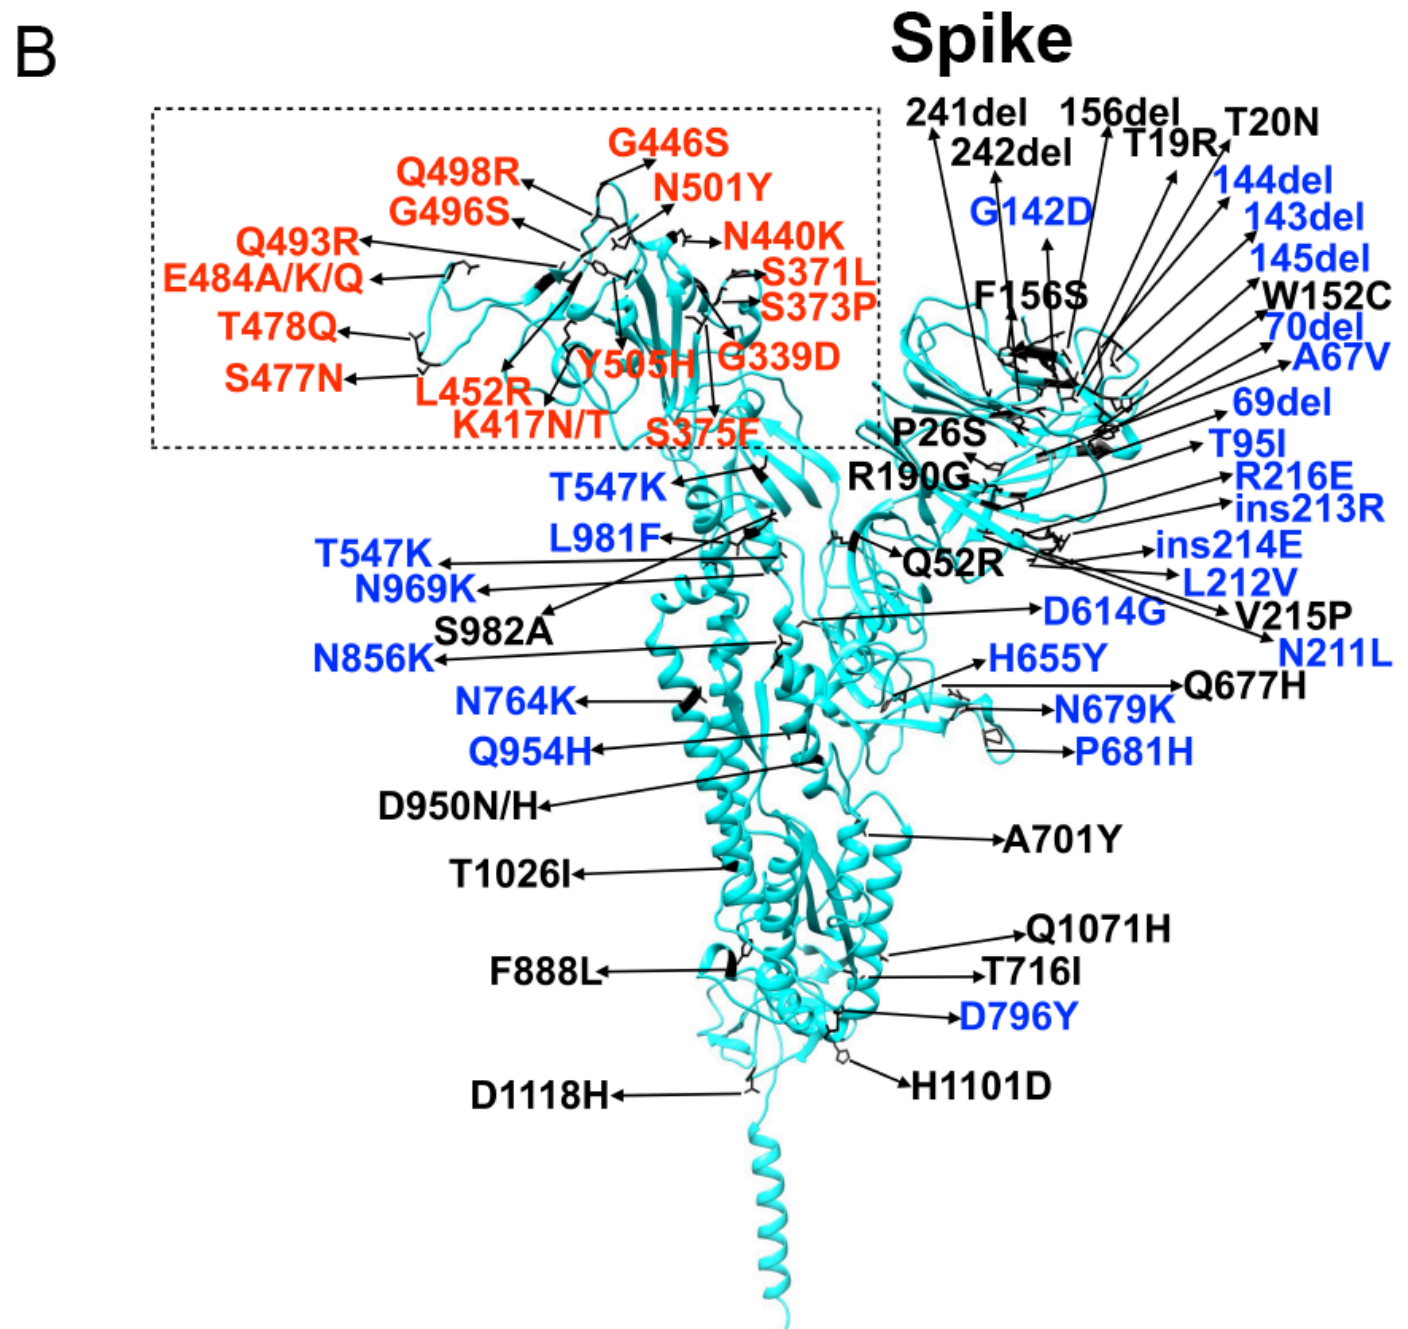

# Step-1 Downloaded 11 million compounds from ZINC database and X-ray crystal structure of Main protease

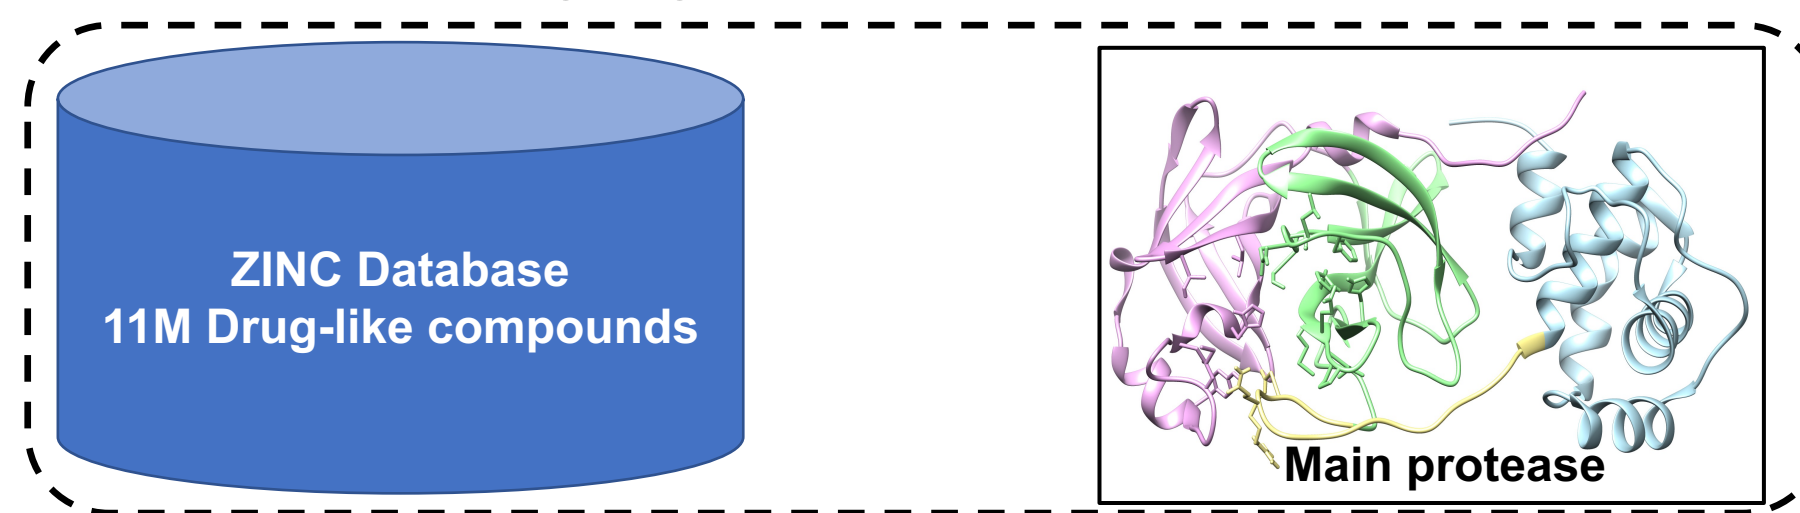

## Step-2 Library and structure preparation

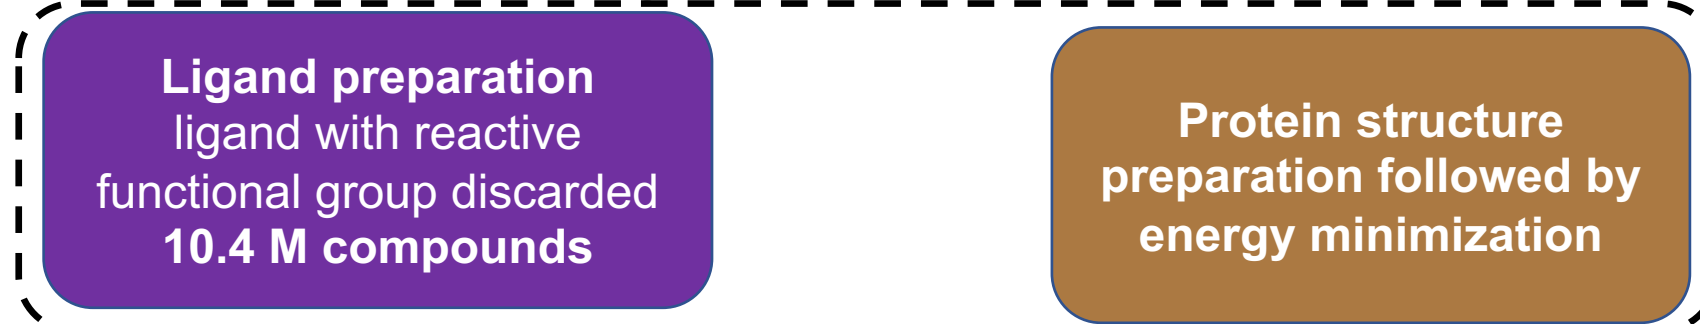

## Step-3 Defining the active site

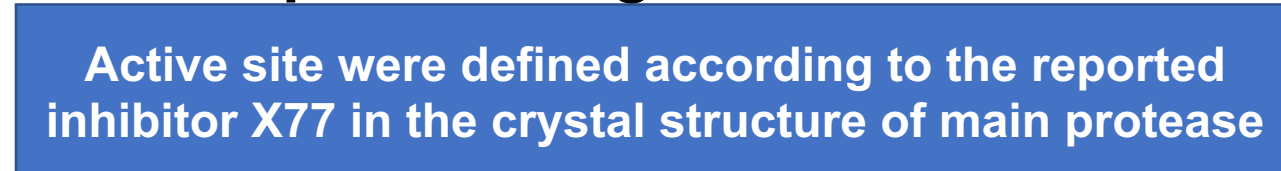

## Step-4 Virtual Screening

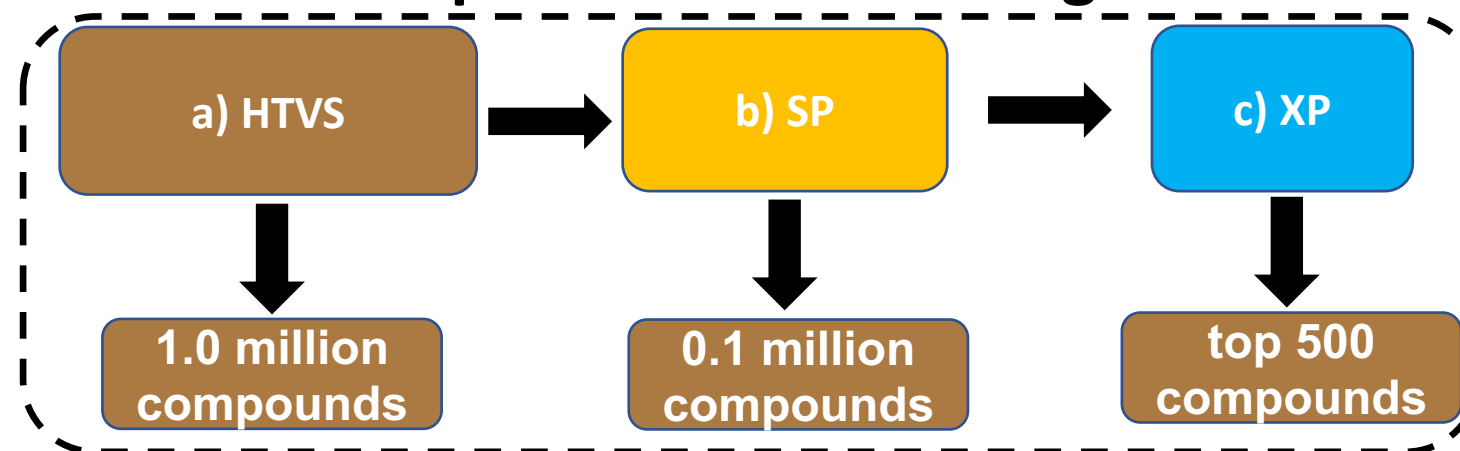

Hits were further validated by using MOE and Vina

## Step-5 Compound Prioritization

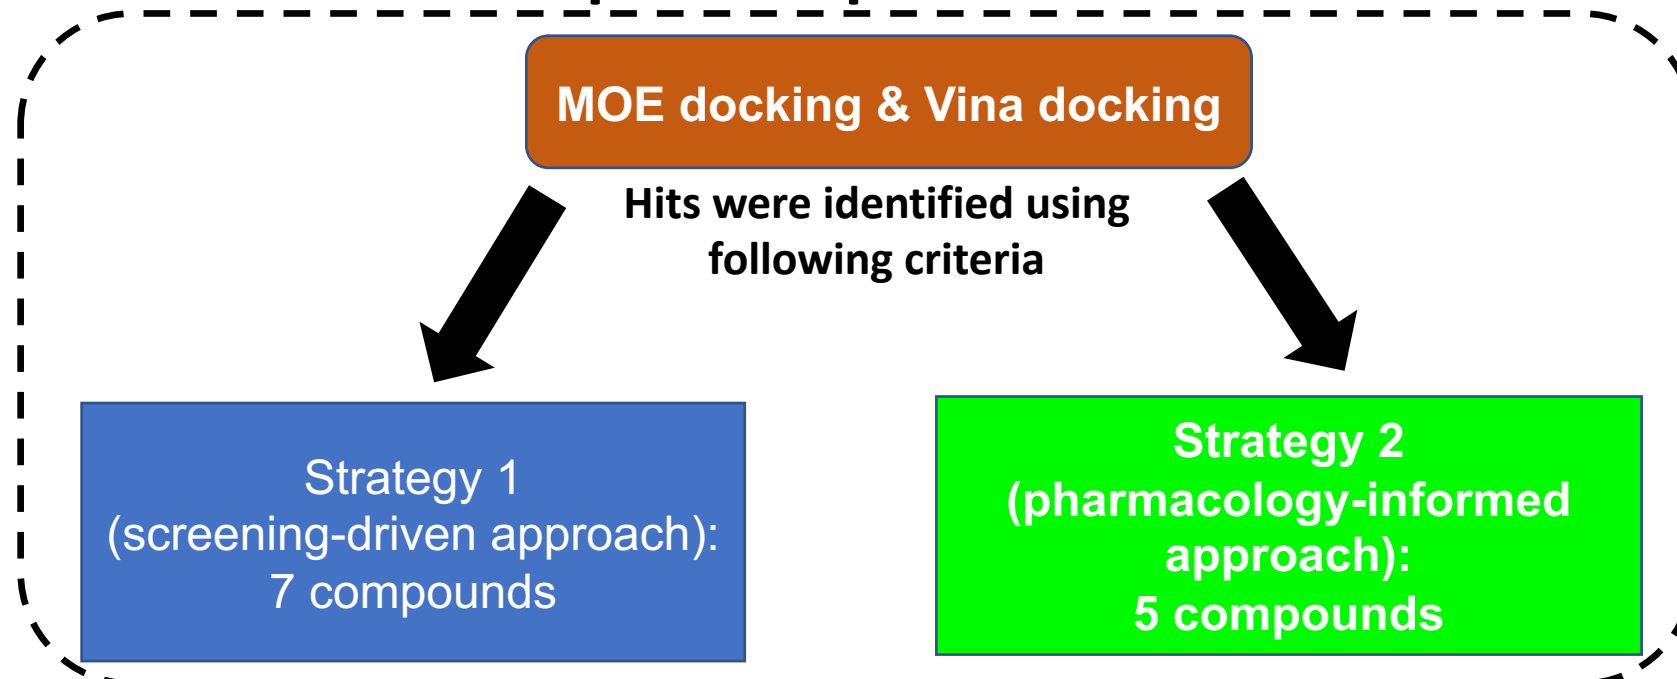

9 anti-SARS-CoV-2 compounds (commercially available)

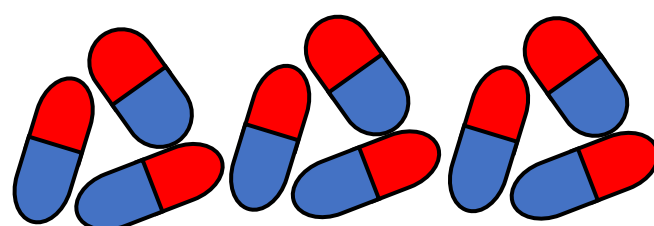

*in vitro* experiments

Figure 2



### PATH-6

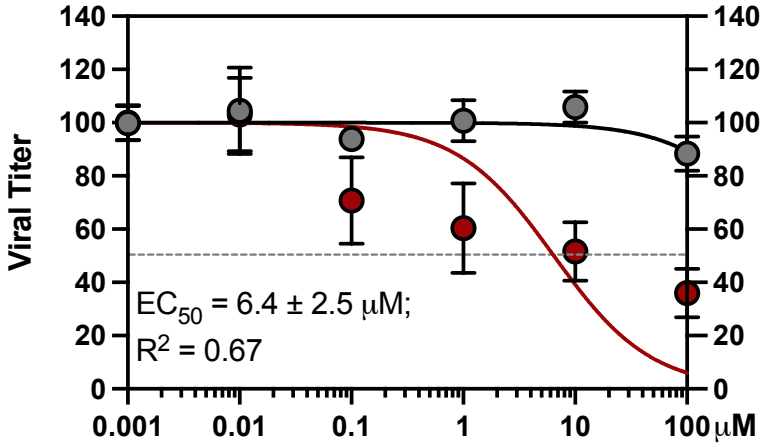

- Viral Titers
- Cytotoxicity

### PATH-7

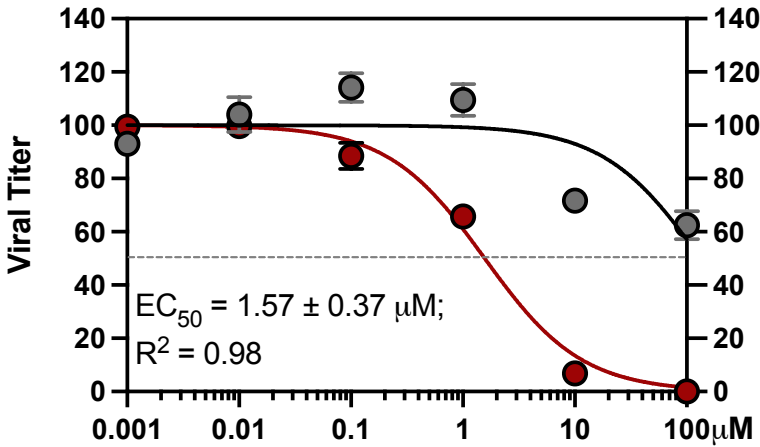

- Viral Titers
- Cytotoxicity

### PATH-8

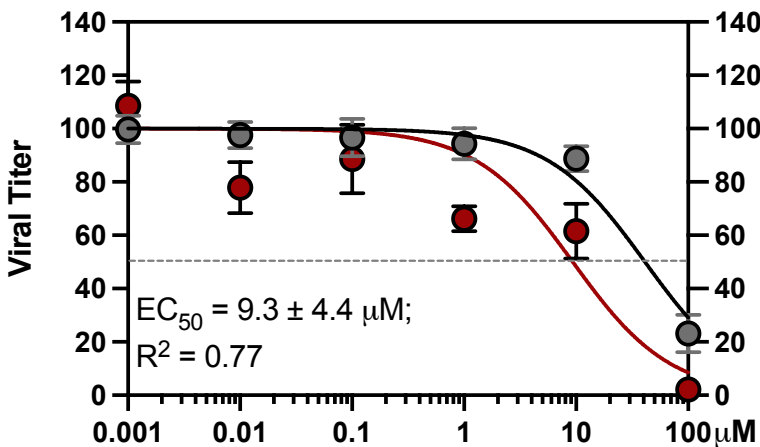

- Viral Titers
- Cytotoxicity
